# Supplementary material
Source: PubMed Central journal article supplement (PMC4639980)
Supplement: JCI81187sd.pdf [file JCI81187sd.pdf]

### **Supplementary Figure 1. CD155 expression on tumor cell lines**

**A)** RNA was extracted from CT26, LLC, B16F10 and MC38 cell lines (Qiagen) and cDNA prepared (BioRad iScript). Real-time PCR was performed using Taqman probes and the 7500 Fast Real-time PCR system (Applied Biosystems). All samples were normalized to  $\beta$ -actin expression. **B)** CT26, LLC, B16F10, and MC38 cell lines were stained with antibody against CD155 (blue histogram). Fluorescence minus one, FMO (red histogram).

### **Supplementary Figure 2. TIGIT is enriched on tumor-infiltrating lymphocytes**

Spleen, tumor draining lymph node (DLN), and tumor-infiltrating lymphocytes (TILs) were harvested from WT Foxp3-GFP knock-in mice (n=7) bearing CT26 colon carcinoma and stained with antibodies against CD4, CD8, and TIGIT. **A)** Frequency +/- SEM of TIGIT<sup>+</sup> cells within CD4<sup>+</sup> and CD8<sup>+</sup> T cells in the spleen, DLN, and TILs as indicated. **B)** Left panels, representative flow cytometry data showing TIGIT expression in CD4<sup>+</sup> Foxp3<sup>-</sup> (GFP<sup>-</sup>) and CD4<sup>+</sup> Foxp3<sup>+</sup> (GFP<sup>+</sup>) TILs. Right panel, frequency +/- SEM of TIGIT<sup>+</sup> Foxp3<sup>-</sup> and Foxp3<sup>+</sup> cells as indicated. Data are representative of 2 experiments. \*\*\*\* p<0.0001 (one-way ANOVA and Tukey's multiple comparisons test). TIGIT<sup>+</sup> Foxp3<sup>+</sup> cells among tissues are compared for (B).

### **Supplementary Figure 3. TIGIT<sup>-/-</sup> CD8<sup>+</sup> TILs produce more cytokines**

WT or TIGIT<sup>-/-</sup> mice (n=3-6) were implanted s.c. with B16F10 (A) or MC38-OVA<sup>dim</sup> (B). On days 10-12, TILs were isolated and stimulated with 10 µg/ml gp100 peptide for 12 hrs (A) or 10 µg/ml OVA<sub>257-264</sub> peptide for 4 hrs (B) and stained with antibodies against surface proteins and IFN-γ (A, B) and IL-2, TNF-α. **A and B)** Representative contour plots and bar graphs showing the frequency +/- SEM of cytokine<sup>+</sup> cells within CD8<sup>+</sup> TILs.

**Supplementary Figure 4. Efficacy of anti-Tim-3 in TIGIT<sup>-/-</sup> mice requires CD8<sup>+</sup> T cells.** WT or TIGIT<sup>-/-</sup> mice were implanted s.c. with B16F10 melanoma cells and treated with 250 µg of isotype control or anti-Tim-3 (RMT3-23) antibodies on day 3, 6, 9, 12. In

some groups, mice were treated i.p. with anti-CD8 $\beta$  (53.5.8, 100  $\mu$ g) or anti-asGM1 (50  $\mu$ g) on days 2, 3, 10 and 14 to deplete CD8 $^{+}$  T cells or NK cells, respectively.

**Supplementary Table 1. List of genes that are differentially regulated in TIGIT $^{+}$  Treg compared to their TIGIT $^{-}$  Treg counterparts in the tumor tissue**

| <b>Gene name</b> | <b>Fold expression<br/>TIGIT<math>^{+}</math>/TIGIT<math>^{-}</math><br/>TIL Treg</b> | <b>SEM</b>  |
|------------------|---------------------------------------------------------------------------------------|-------------|
| Lag3             | 13.57369442                                                                           | 0.348895137 |
| TIGIT            | 8.569699312                                                                           | 3.460576538 |
| CCR8             | 7.62873218                                                                            | 3.58964762  |
| IL-10            | 6.578844942                                                                           | 2.355730978 |
| Arnt2            | 6.066391762                                                                           | 0.927354329 |
| RUNX2            | 5.538881806                                                                           | 0.556077067 |
| Il2ra            | 5.25078646                                                                            | 1.667739759 |
| IL1r2            | 5.159677665                                                                           | 1.009931752 |
| Pdcd1            | 5.091941289                                                                           | 0.181209093 |
| ITGA3            | 4.849276943                                                                           | 0.445533627 |
| IL12RB2          | 4.794796421                                                                           | 2.544775772 |
| Klrg1            | 4.613976658                                                                           | 1.794179219 |
| CXCR6            | 4.58486956                                                                            | 1.929836322 |
| IKZF3            | 4.42299837                                                                            | 1.800529894 |
| CTLA4            | 4.256684205                                                                           | 1.995032999 |
| Rgs16            | 4.12312849                                                                            | 0.351629116 |
| ICOS             | 4.064769166                                                                           | 2.345165865 |
| FoxP3            | 4.016600576                                                                           | 2.490899939 |
| CCL5             | 4.009624818                                                                           | 0.120641355 |
| TBX21            | 3.799587462                                                                           | 1.198606633 |
| IL27R            | 3.751491521                                                                           | 1.615061559 |
| IL12RB1          | 3.481480436                                                                           | 1.828983408 |
| prdm1            | 3.450755365                                                                           | 1.690409181 |
| IL2RB            | 3.436597248                                                                           | 1.289463645 |
| NFATc1           | 3.284659262                                                                           | 0.845606911 |
| BATF             | 3.194940439                                                                           | 0.440481462 |
| Havcr2           | 2.841018212                                                                           | 0.729312527 |
| CD39             | 2.740638883                                                                           | 0.29257825  |
| Il15ra           | 2.634837605                                                                           | 0.615221021 |
| CXCR3            | 2.621173972                                                                           | 1.354337885 |
| CCL4             | 2.507625622                                                                           | 0.185196491 |

|          |              |             |
|----------|--------------|-------------|
| CMTM6    | 2.484592365  | 0.152596646 |
| EBi3     | 2.363257325  | 0.496560937 |
| CCR5     | 2.328110797  | 0.269163629 |
| RORA     | 2.321802166  | 0.535809949 |
| IL10RA   | 2.27833987   | 0.181799242 |
| ID2      | 2.143822143  | 0.022666183 |
| CCR2     | 2.125290693  | 0.436892902 |
| STAT1    | 2.092107006  | 0.577375443 |
| Lef1     | 2.025888507  | 0.41005116  |
| TGFB1    | 2.017581607  | 0.14908506  |
| PRF1     | 2.00468882   | 0.197182837 |
| CASP6    | 1.949569049  | 0.143528865 |
| RUNX1    | 1.943855276  | 0.214004255 |
| NFIL3    | 1.918059155  | 0.292151627 |
| IRF8     | 1.910407709  | 0.105236063 |
| STAT3    | 1.809905639  | 0.139969333 |
| Pdcd11   | 1.755902118  | 0.055761873 |
| L1CAM    | 1.708409463  | 0.034906045 |
| Tob      | -2.263776955 | 0.113320179 |
| ACVR2A   | -2.228971361 | 0.086179776 |
| BATF3    | -2.375177754 | 0.064317176 |
| PROCR    | -2.584209713 | 0.141885713 |
| IFNGR2   | -2.675907683 | 0.082911768 |
| KLF7     | -2.708204363 | 0.133016108 |
| JUN      | -2.792687699 | 0.032070834 |
| BATF2    | -2.858338676 | 0.077493974 |
| Bcl6     | -3.015987778 | 0.015749056 |
| Bcl2     | -3.057464012 | 0.009271697 |
| CCL12    | -3.275708924 | 0.052316091 |
| Grail    | -3.599756216 | 0.277413015 |
| Tcf7     | -3.851438535 | 0.11926965  |
| NFE2L2   | -3.906298901 | 0.071287882 |
| Gpr56    | -4.322811077 | 0.054410515 |
| IL1rn    | -4.414808494 | 0.011458391 |
| KLF3     | -5.82088016  | 0.082153866 |
| DDR1     | -6.404698133 | 0.099294648 |
| Serpine1 | -12.58766961 | 0.066357279 |

**Supplementary Table 1. List of genes that are differentially regulated in TIGIT<sup>+</sup> Treg compared to their TIGIT<sup>-</sup> Treg counterparts in the tumor tissue**

TIGIT<sup>+</sup> and TIGIT<sup>-</sup> Treg cells were sorted from B16F10 tumors of Foxp3 GFP KI mice. Gene expression was analyzed using a custom nanostring codeset. Fold expression +/- SEM of differentially regulated genes in the TIGIT<sup>+</sup> TIL Treg compared to TIGIT<sup>-</sup> counterparts are shown. Data are pooled from two independent experiments.

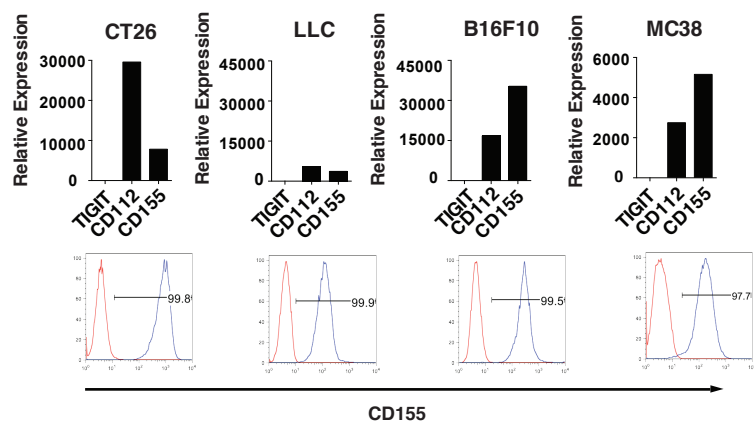

Supplementary Figure 1

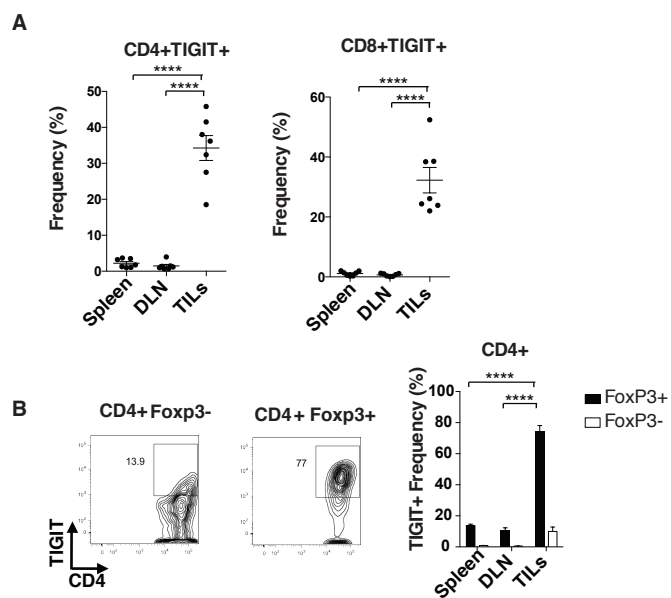

Supplementary Figure 2

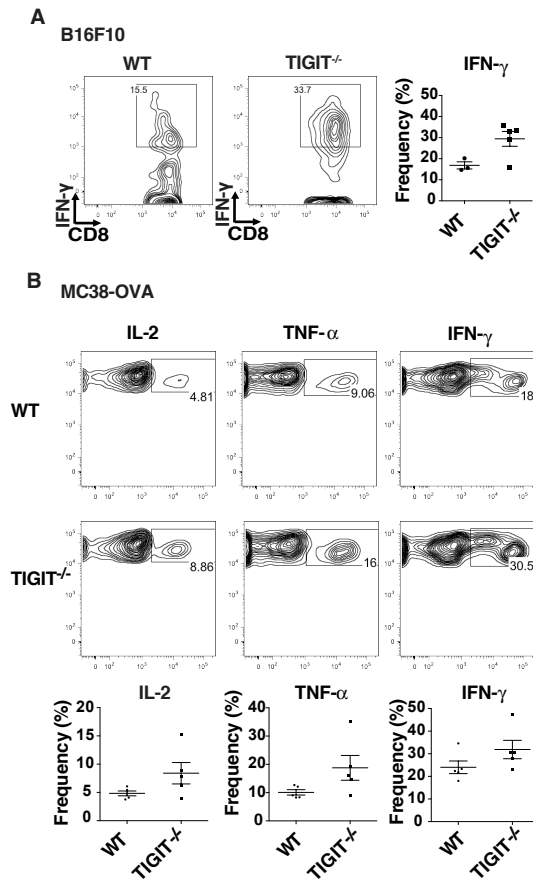

Supplementary Figure 3

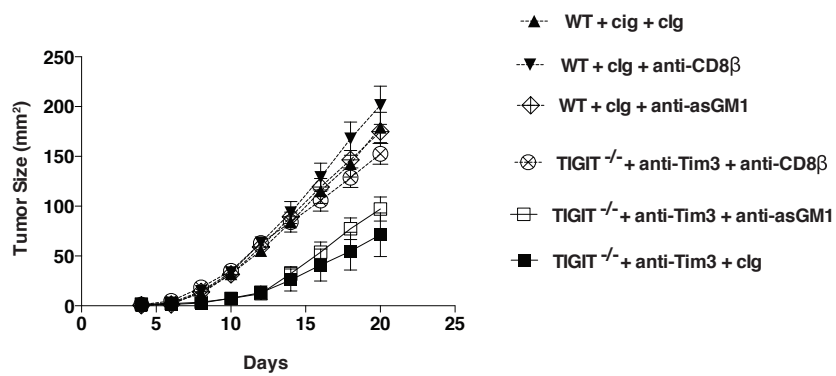

Supplementary Figure 4
